# Supplementary material for: Sleep Quality Is Associated with Vitamin B12 Status in Female Arab Students
Source: MDPI journal article supplement (doi:10.3390/ijerph18094548), 2021-04-25
Supplement: s1 [file s1]

**Table S1.** Analysis of covariance between PSQI scores and serum vitamin B12 status.

| Vitamin B12 Status      | Mean $\pm$ SE | <i>p</i> -value * |
|-------------------------|---------------|-------------------|
| Low (<221 pmol/l)       | 7.1 $\pm$ 0.6 | 0.63              |
| Normal (221–701 pmol/l) | 7.6 $\pm$ 0.2 |                   |
| Excess (>701 pmol/l)    | 7.4 $\pm$ 0.5 |                   |

Data presented as Mean  $\pm$  SE; \* indicates *p*-values adjusted for WHR and stress. Pittsburgh Sleep Quality Index (PSQI).

**Table S2.** Analysis of covariance between PSQI scores and serum vitamin B12 tertiles.

| Vitamin B12 Status           | Mean $\pm$ SE | <i>p</i> -value * |
|------------------------------|---------------|-------------------|
| Tertile 1 (<333.05 pmol/l)   | 7.5 $\pm$ 0.3 | 0.88              |
| Tertile 2 (333.1–482 pmol/l) | 7.7 $\pm$ 0.3 |                   |
| Tertile 3 (>482 pmol/l)      | 7.6 $\pm$ 0.3 |                   |

Data presented as Mean  $\pm$  SE; \* indicates *p*-values adjusted for WHR and stress. Pittsburgh Sleep Quality Index (PSQI).

**Table S3.** Association between serum vitamin B12 status and sleep status.

|                         | Unadjusted    |                 | Adjusted      |                 |
|-------------------------|---------------|-----------------|---------------|-----------------|
|                         | OR (95% CI)   | <i>P</i> -value | OR (95% CI)   | <i>p</i> -value |
| Normal (221–701 pmol/l) |               |                 | Reference     |                 |
| Low (<221 pmol/l)       | 0.9 (0.4–2.5) | 0.880           | 0.9 (0.3–2.6) | 0.897           |
| Excess (>701 pmol/l)    | 0.9 (0.4–2.2) | 0.863           | 1.0 (0.4–2.5) | 0.977           |

ORs and 95% CIs for ORs were obtained using multivariate logistic regression analysis, taking poor sleep status as a dependent variable against serum vitamin B12 clinical cutoff groups as independent risk. *P* < 0.05 considered significant. The adjusted model adjusted for WHR and stress.

**Table S4.** Correlation between sleep and serum vitamin B12 by deficiency, normal and excess.

| Vitamin B12 (pmol/L)      |                 | Low (N = 21)    | Normal (N = 292) | Excess (N = 28)  |
|---------------------------|-----------------|-----------------|------------------|------------------|
|                           |                 | $\leq 221$      | 221–701          | $\geq 702$       |
| Sleep Quality             | B $\pm$ SE      | –1.2 $\pm$ 11.4 | 7.8 $\pm$ 9.0    | 17.2 $\pm$ 31.6  |
|                           | <i>P</i> -value | 0.91            | 0.39             | 0.59             |
| Sleep Latency             | B $\pm$ SE      | 1.9 $\pm$ 10.8  | –8.1 $\pm$ 7.8   | –45.4 $\pm$ 17.0 |
|                           | <i>P</i> -value | 0.86            | 0.30             | 0.013            |
| Sleep Duration            | B $\pm$ SE      | 9.5 $\pm$ 7.4   | 1.8 $\pm$ 6.8    | 3.2 $\pm$ 16.1   |
|                           | <i>P</i> -value | 0.20            | 0.80             | 0.85             |
| Habitual Sleep Efficiency | B $\pm$ SE      | –0.3 $\pm$ 9.5  | –3.1 $\pm$ 7.3   | 22.4 $\pm$ 20.6  |
|                           | <i>P</i> -value | 0.98            | 0.67             | 0.29             |
| Sleep Disturbance         | B $\pm$ SE      | 27.1 $\pm$ 26.7 | 8.4 $\pm$ 15.1   | –88.1 $\pm$ 55.5 |
|                           | <i>P</i> -value | 0.33            | 0.58             | 0.12             |
| Sleep Medication          | B $\pm$ SE      | 37.3 $\pm$ 35.6 | –15.1 $\pm$ 19.4 | 48.5 $\pm$ 49.5  |
|                           | <i>P</i> -value | 0.31            | 0.44             | 0.34             |
| Sleep Day Dysfunction     | B $\pm$ SE      | 11.1 $\pm$ 11.1 | 0.4 $\pm$ 7.8    | 2.0 $\pm$ 22.6   |
|                           | <i>P</i> -value | 0.33            | 0.96             | 0.93             |
| Total PSQI                | B $\pm$ SE      | 4.3 $\pm$ 3.5   | –0.3 $\pm$ 2.6   | –5.8 $\pm$ 8.5   |
|                           | <i>P</i> -value | 0.23            | 0.90             | 0.50             |

Beta  $\pm$  SE and 95% CIs were obtained using linear regression analysis, taking sleep components as dependent variable against serum vitamin B12 cut off groups as independent risk. *P*-values are adjusted for WHR and stress. Pittsburgh Sleep Quality Index (PSQI).
